# Supplementary material for: Fabrication and performance evaluation of button cell supercapacitors based on MnO2 nanowire/carbon nanobead electrodes
Source: Royal Society of Chemistry journal article supplement (doi:10.1039/c3ra41992d), 2013-01-01
Supplement: c3ra41992d.pdf [file c3ra41992d.pdf]

*Electronic Supplementary Information (ESI)-I*

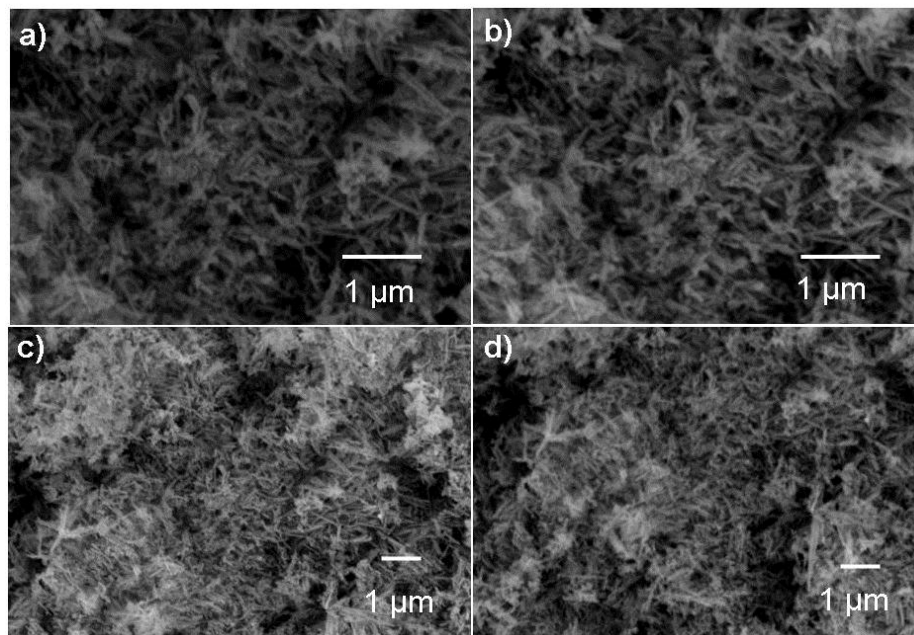

Figure S-I. SEM images of a) MC-5, b) MC-10, c) MC-20 and d) MC-50 (scale bar represents 1 μm)

*ESI-2*

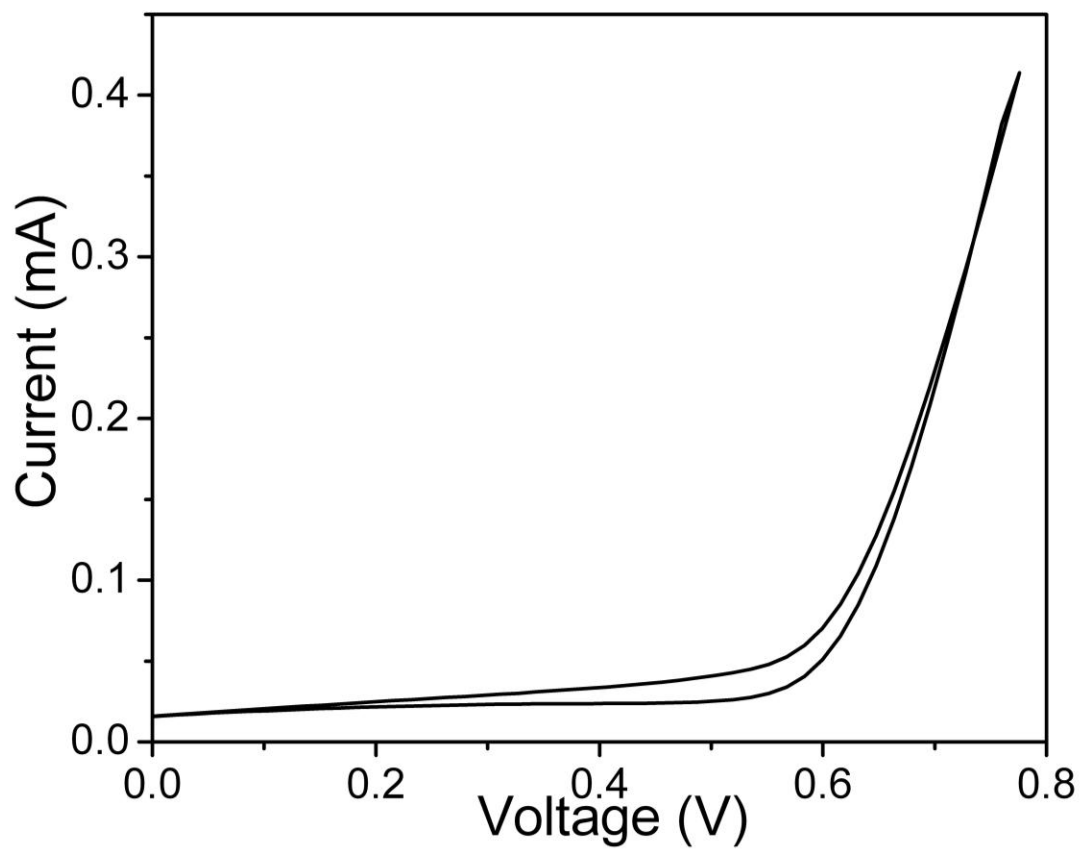

Figure S-2. Cyclic voltammetry curve of bare titanium substrate at 1 mVs<sup>-1</sup> scan rate.

*ESI-3*

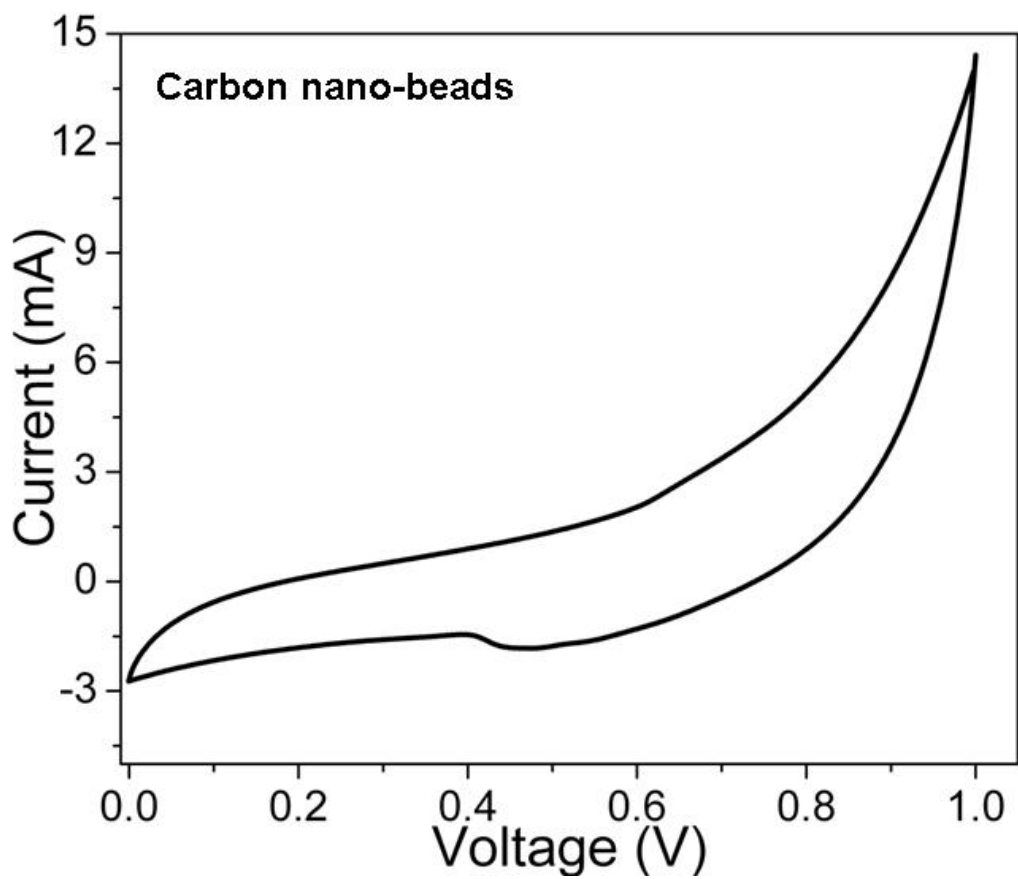

Figure S-3. Typical cyclic voltammetric curve of camphoric carbon nanobeads at  $50 \text{ mVs}^{-1}$  scan rate.

*ESI-4*

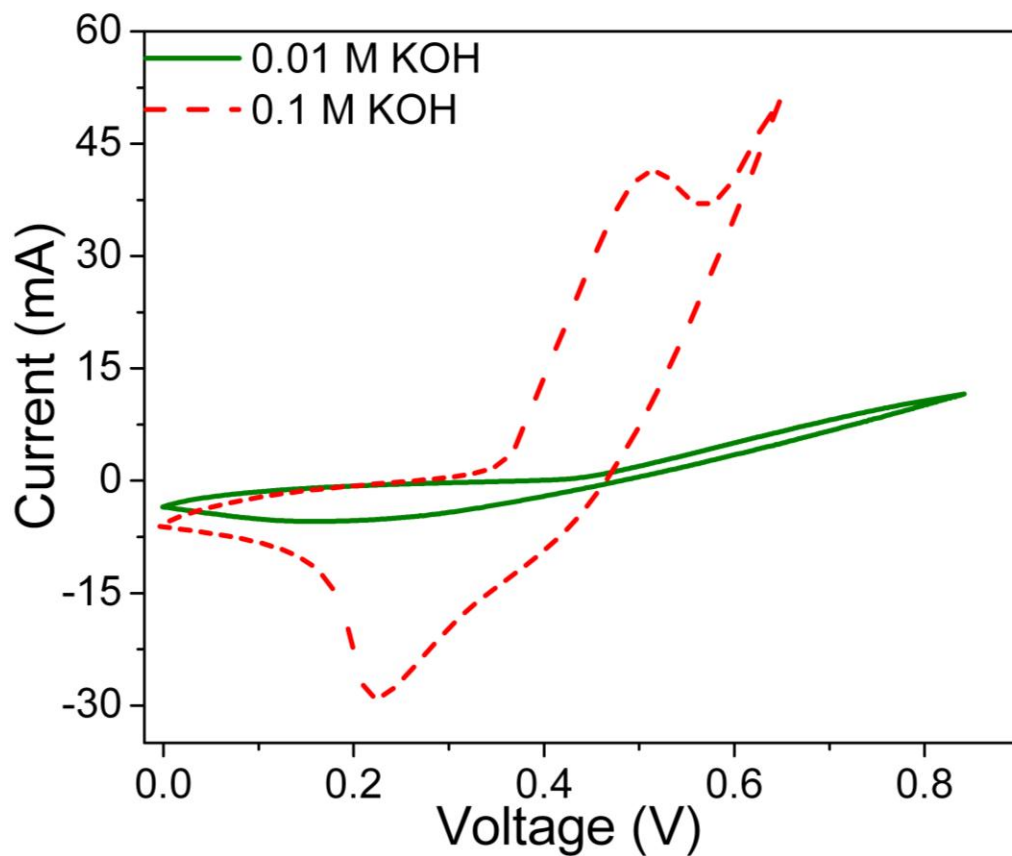

Figure S-4. CV curves of MC-10 electrode in different molar concentration KOH electrolyte at 10 mVs<sup>-1</sup> scan rate.

ESI-5

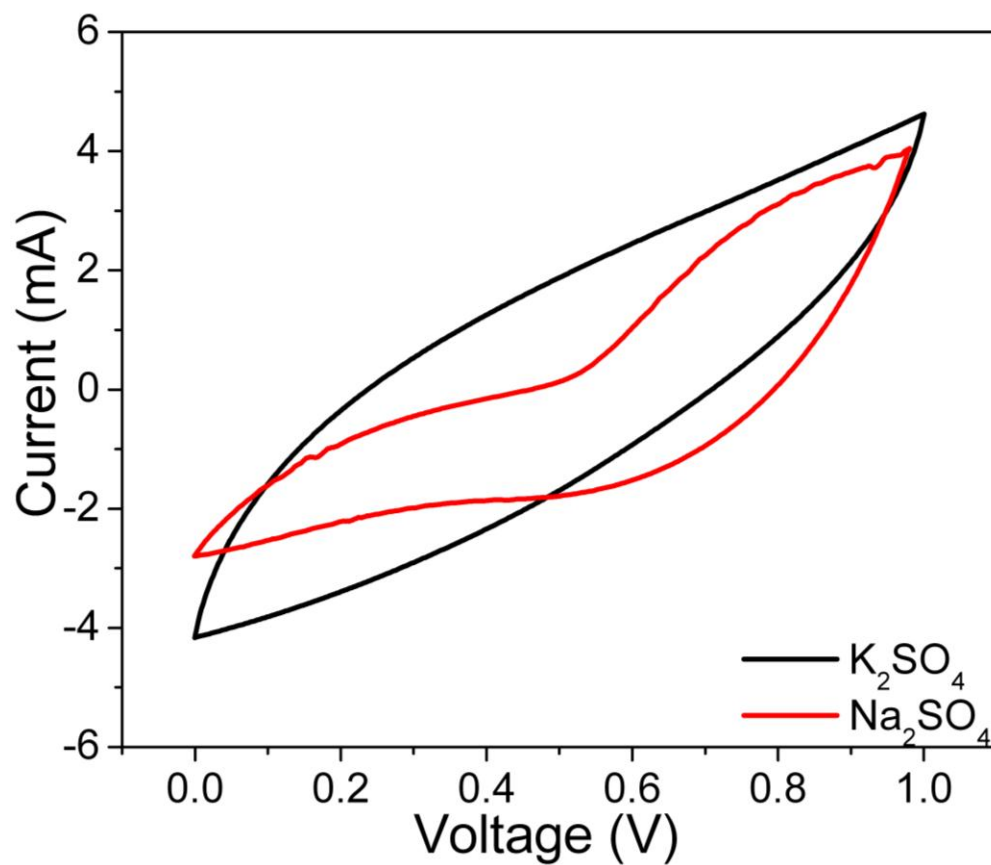

Figure S-5. CV curves in  $Na_2SO_4$  and in  $K_2SO_4$  electrolytes at  $10 \text{ mVs}^{-1}$  scan rate. The area under the CV curve in  $K_2SO_4$  was found to be larger as compare to  $Na_2SO_4$  which could be attributed lower hydrated radius of  $K^+$  ions.

ESI-6

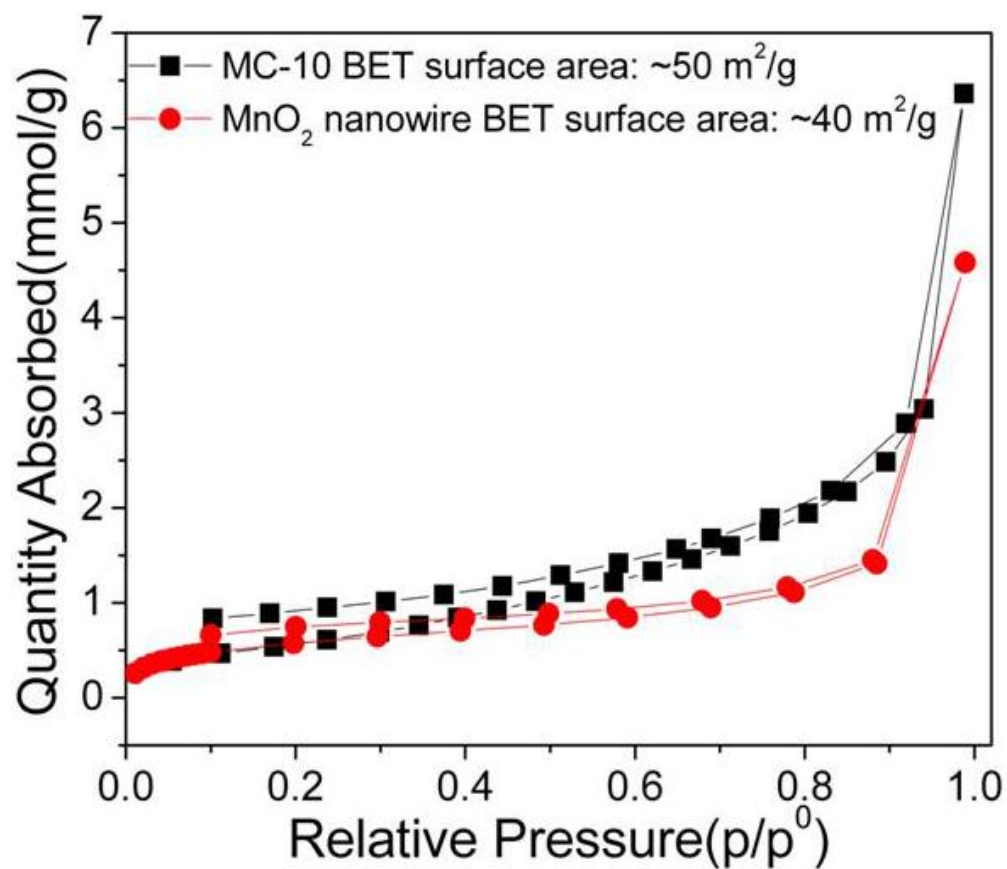

Figure S-6. BET analysis of MnO<sub>2</sub> nanowires and MC-10 electrodes.
